# Supplementary material for: Interplay between Lipids and Complement Proteins—How Multiomics Data Integration Can Help Unravel Age-related Macular Degeneration Pathophysiology: A Proof-of-concept Study
Source: PubMed Central journal article supplement — Ophthalmol Sci. 2024 Oct 1;5(1):100629. doi: 10.1016/j.xops.2024.100629 (PMC11609548; doi:10.1016/j.xops.2024.100629), 2024-10-01

Figure S1. Projection to Latent Structure-Discriminant Analysis (PLS-DA) analysis performed separately for each omics data. (0 and 1 in the legend correspond to no AMD and AMD, respectively)

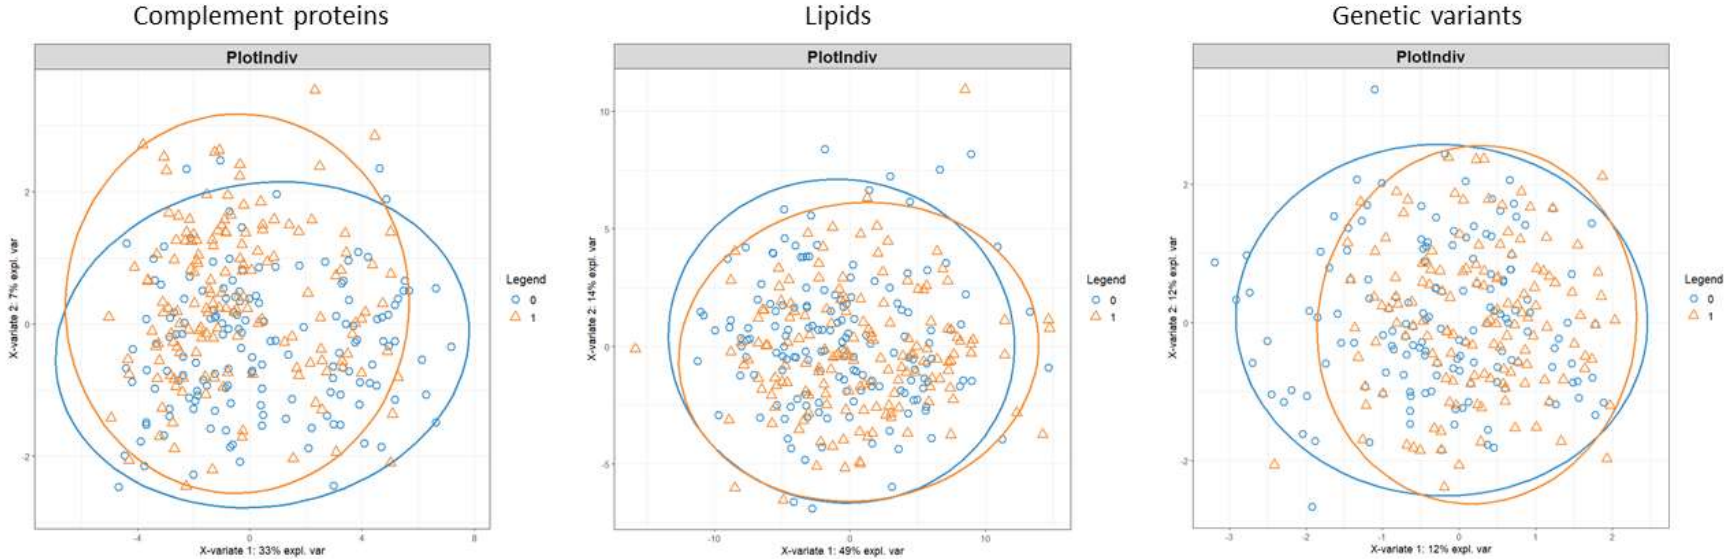

Supplement: mmc1.pdf [file mmc1.pdf]
