# Supplementary material for: Interplay between Lipids and Complement Proteins—How Multiomics Data Integration Can Help Unravel Age-related Macular Degeneration Pathophysiology: A Proof-of-concept Study
Source: PubMed Central journal article supplement — Ophthalmol Sci. 2024 Oct 1;5(1):100629. doi: 10.1016/j.xops.2024.100629 (PMC11609548; doi:10.1016/j.xops.2024.100629), 2024-10-01

Figure S2. Selection of the number of components. Based on this graph, two components were selected.

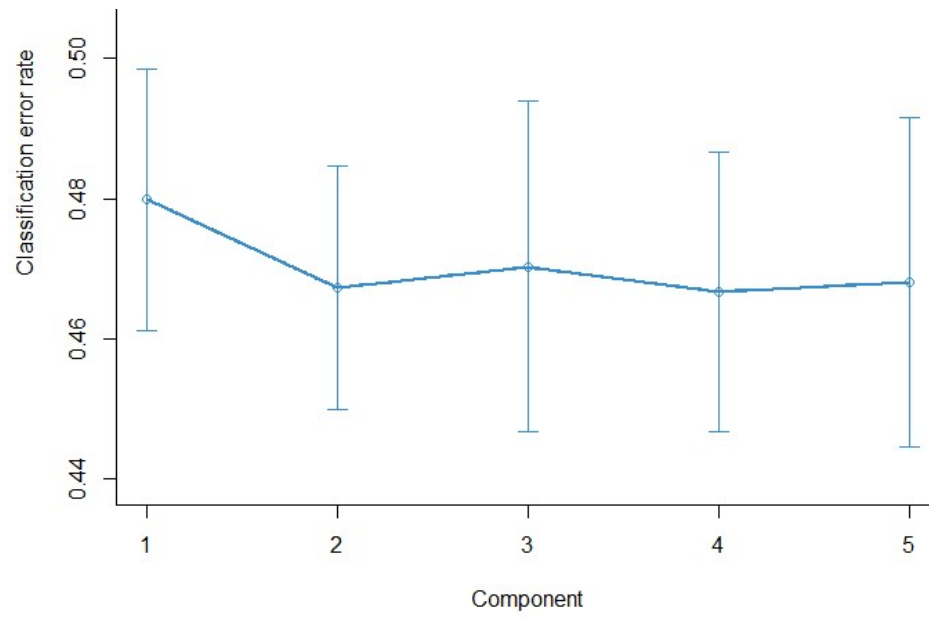

Supplement: mmc2.pdf [file mmc2.pdf]
