# Supplementary material for: Interplay between Lipids and Complement Proteins—How Multiomics Data Integration Can Help Unravel Age-related Macular Degeneration Pathophysiology: A Proof-of-concept Study
Source: PubMed Central journal article supplement — Ophthalmol Sci. 2024 Oct 1;5(1):100629. doi: 10.1016/j.xops.2024.100629 (PMC11609548; doi:10.1016/j.xops.2024.100629), 2024-10-01

**Figure S3.** Distribution of the lipids and complement proteins selected by the multi-block sPLS-DA model. The distributions were log transformed and standardized (centred and scaled).

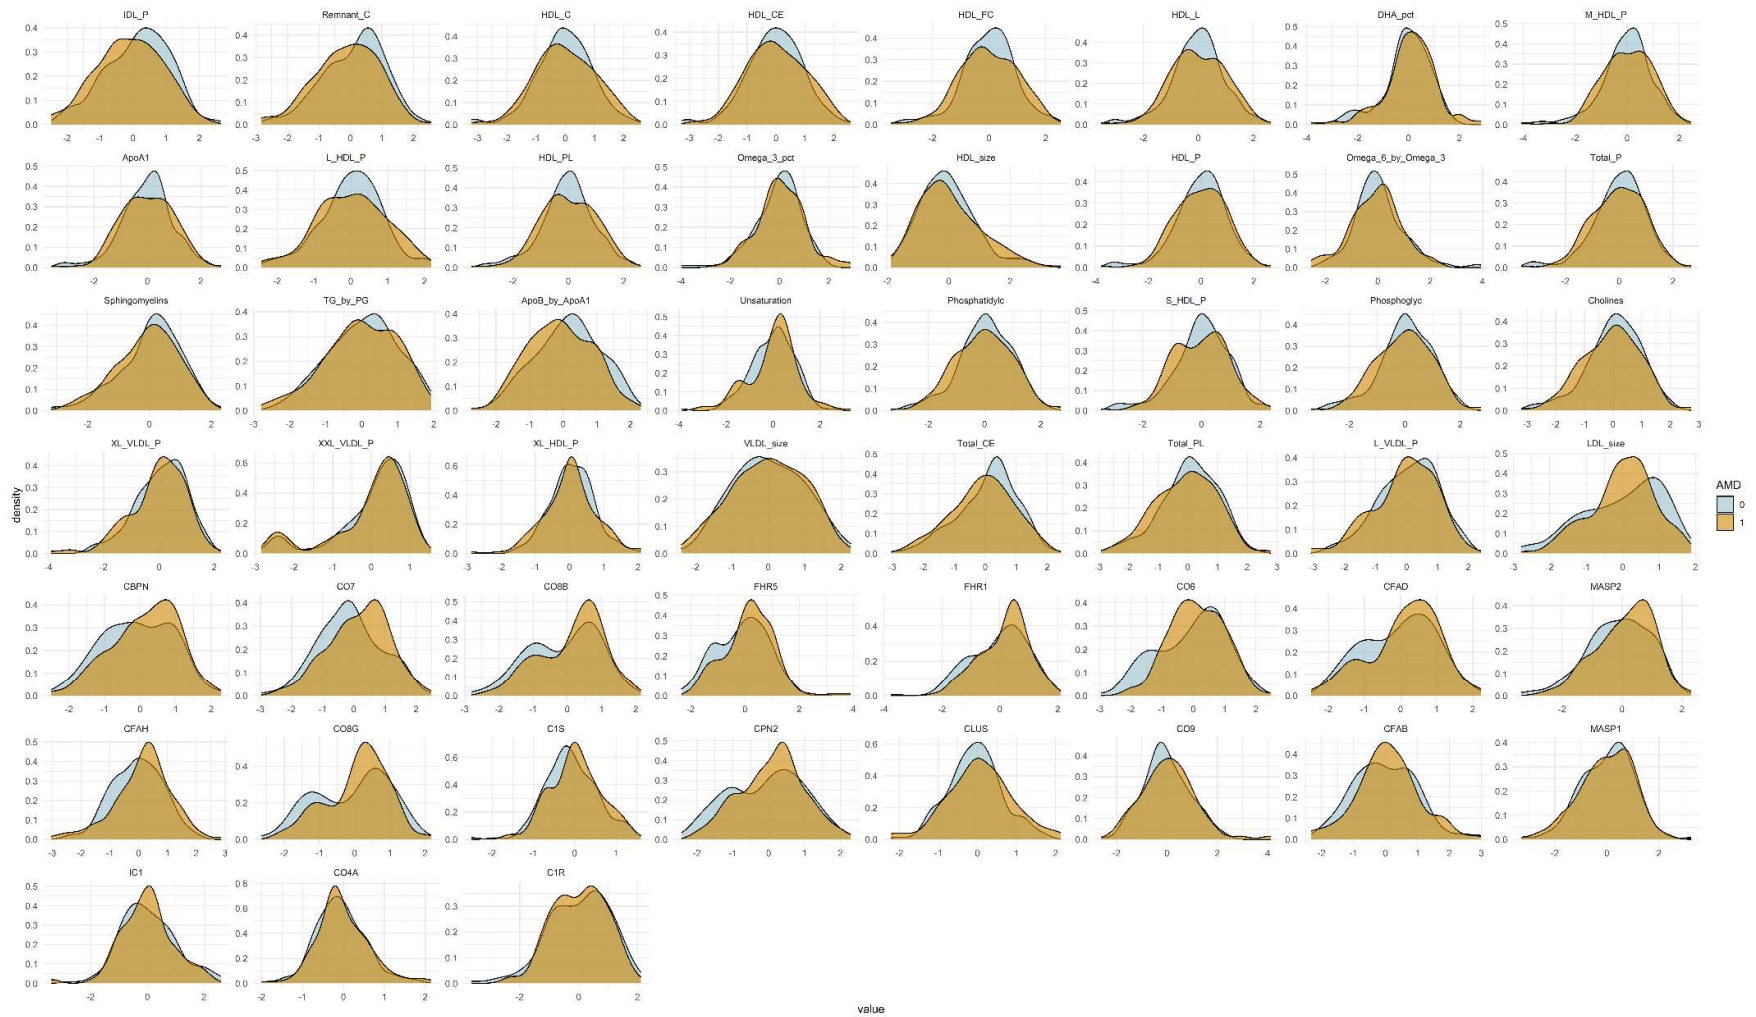

Supplement: mmc3.pdf [file mmc3.pdf]
