# Supplementary material for: Interplay between Lipids and Complement Proteins—How Multiomics Data Integration Can Help Unravel Age-related Macular Degeneration Pathophysiology: A Proof-of-concept Study
Source: PubMed Central journal article supplement — Ophthalmol Sci. 2024 Oct 1;5(1):100629. doi: 10.1016/j.xops.2024.100629 (PMC11609548; doi:10.1016/j.xops.2024.100629), 2024-10-01

**Figure S5.** contributions to AMD, expressed odds ratios with their 95% confidence intervals using a logistic regression model, of the complement proteins (n=19) (A), lipids (n=32) (B), and genetic variants (n=3) (C) selected by the multi-block sPLS-DA model. Each variable was tested separately in a different model adjusted on age, sex, hypertension, diabetes, BMI, smoking status and lipid-lowering medications. Red triangles correspond to significant ORs ( $p < 0.05$ )

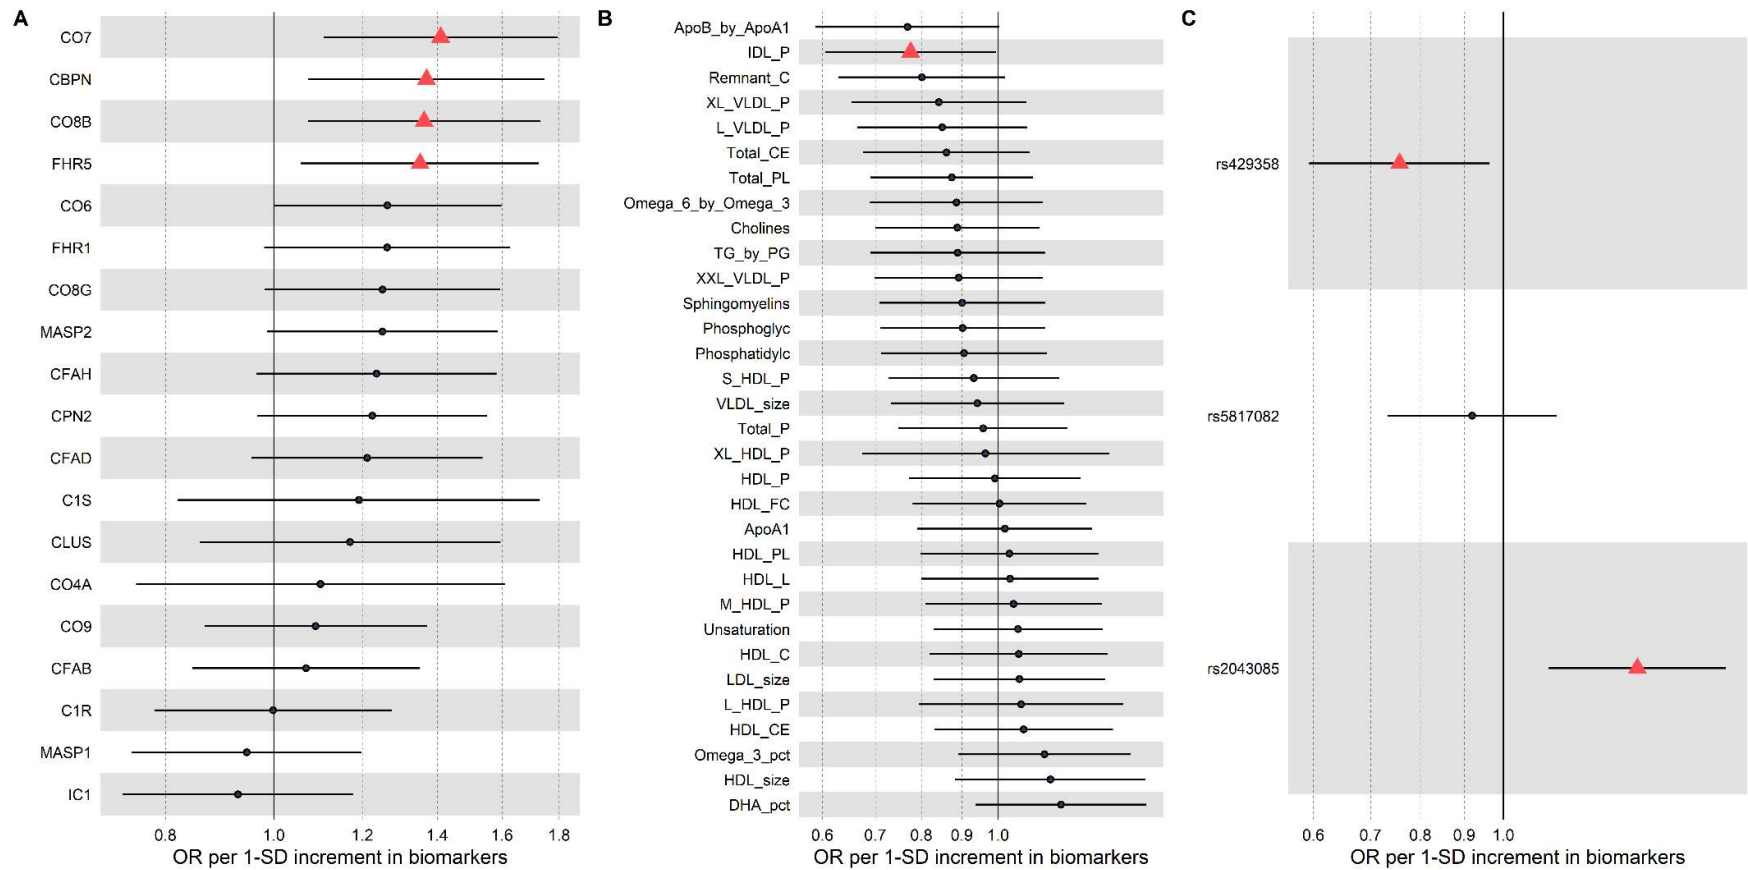

Supplement: mmc4.pdf [file mmc4.pdf]
