# Supplementary material for: Interplay between Lipids and Complement Proteins—How Multiomics Data Integration Can Help Unravel Age-related Macular Degeneration Pathophysiology: A Proof-of-concept Study
Source: PubMed Central journal article supplement — Ophthalmol Sci. 2024 Oct 1;5(1):100629. doi: 10.1016/j.xops.2024.100629 (PMC11609548; doi:10.1016/j.xops.2024.100629), 2024-10-01

**Figure S10.** correlations between the 3 genetic variants, 32 lipids, and 19 complement proteins selected by the multi-block sPLS-DA model. Only the correlations  $\geq 0.75$  are considered in this graph to simplify the reading.

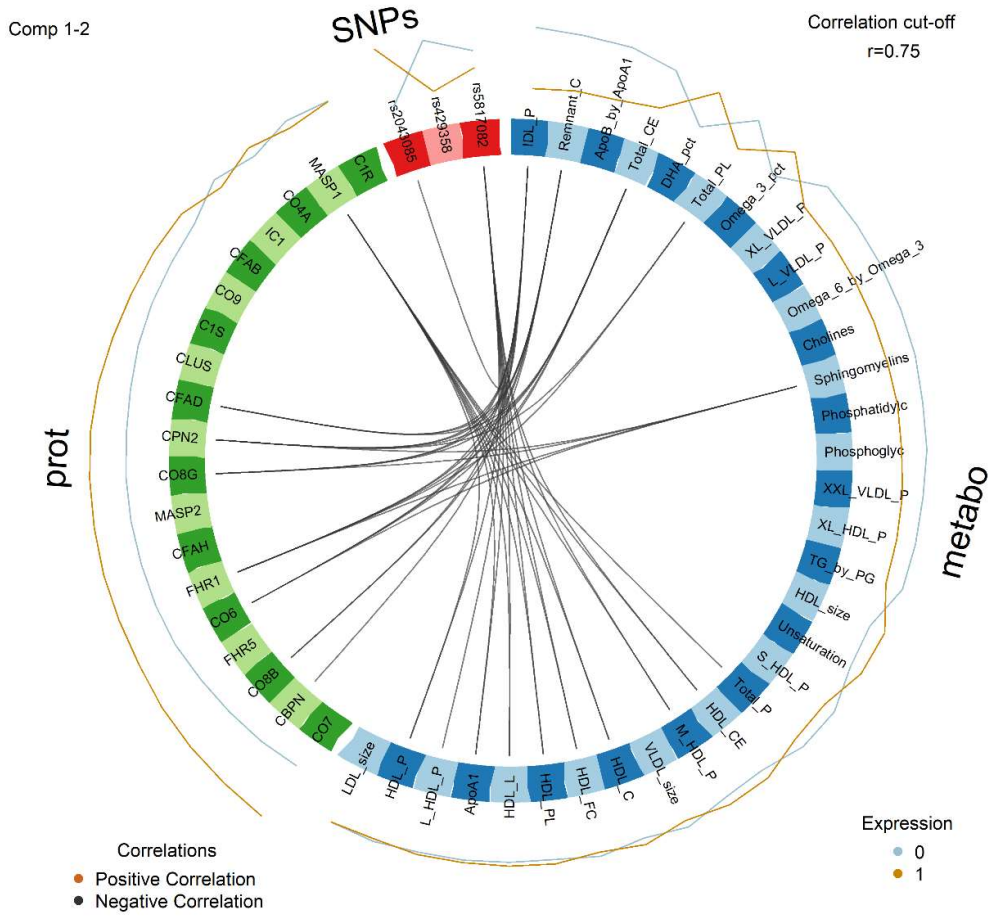

Supplement: mmc7.pdf [file mmc7.pdf]
